# Supplementary material
Source: PubMed Central journal article supplement (PMC1868063)
Supplement: pbio.0050129.sg003.pdf [file pbio.0050129.sg003.pdf]

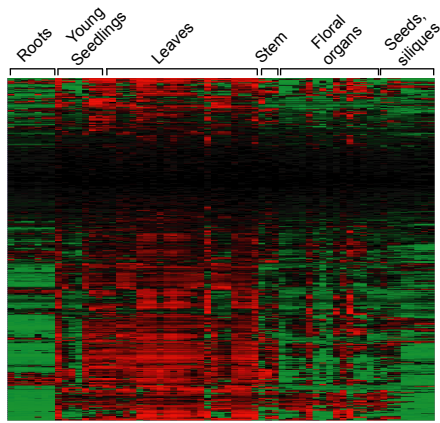

| GO Term    | % in Genome | % in Cluster | p-value      | definition                      |
|------------|-------------|--------------|--------------|---------------------------------|
| GO:0006952 | 1.9%        | 8.9%         | $10^{-30}$   | defense response                |
| GO:0016020 | 23.5%       | 38.3%        | $10^{-30}$   | membrane                        |
| GO:0012505 | 14.6%       | 25.6%        | $10^{-10.9}$ | endomembrane system             |
| GO:0050896 | 8.9%        | 20.2%        | $10^{-10.5}$ | response to stimulus            |
| GO:0004888 | 0.7%        | 3.7%         | $10^{-8.6}$  | transmembrane receptor activity |
| GO:0003700 | 6.3%        | 13.2%        | $10^{-8.3}$  | transcription factor activity   |

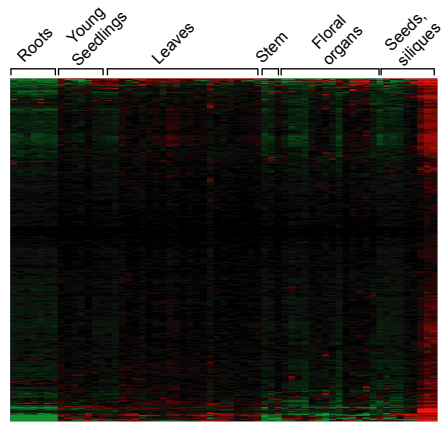

| GO Term    | % in Genome | % in Cluster | p-value     | definition                                                                   |
|------------|-------------|--------------|-------------|------------------------------------------------------------------------------|
| GO:0006350 | 6.0%        | 11.6%        | $10^{-6.6}$ | transcription                                                                |
| GO:0045449 | 5.7%        | 10.9%        | $10^{-6.1}$ | regulation of transcription                                                  |
| GO:0019219 | 5.8%        | 10.9%        | $10^{-6.0}$ | regulation of nucleobase, nucleoside, nucleotide and nucleic acid metabolism |
| GO:0031323 | 5.9%        | 11.1%        | $10^{-5.9}$ | regulation of cellular metabolism                                            |
| GO:0019222 | 6.0%        | 11.1%        | $10^{-6.7}$ | regulation of metabolism                                                     |
| GO:0006355 | 3.5%        | 7.5%         | $10^{-5.6}$ | regulation of transcription, DNA-dependent                                   |

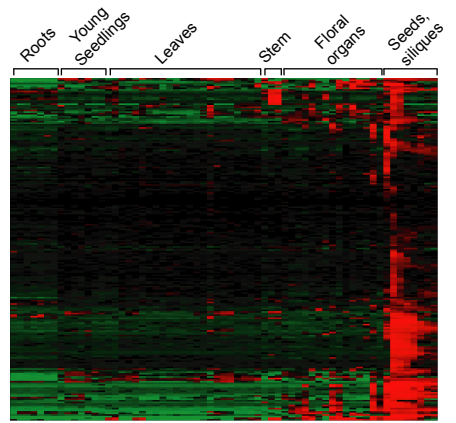

| GO Term    | % in Genome | % in Cluster | p-value     | definition                           |
|------------|-------------|--------------|-------------|--------------------------------------|
| GO:0004126 | 0.0%        | 2.3%         | $10^{-8.0}$ | cytidine deaminase activity          |
| GO:0019005 | 0.1%        | 2.8%         | $10^{-7.5}$ | SCF ubiquitin ligase complex         |
| GO:0031461 | 0.1%        | 2.8%         | $10^{-7.3}$ | cullin-RING ubiquitin ligase complex |
| GO:0019239 | 0.1%        | 2.3%         | $10^{-7.3}$ | deaminase activity                   |
| GO:0030528 | 6.8%        | 17.6%        | $10^{-7.2}$ | transcription regulator activity     |
| GO:0003700 | 6.3%        | 16.2%        | $10^{-6.7}$ | transcription factor activity        |

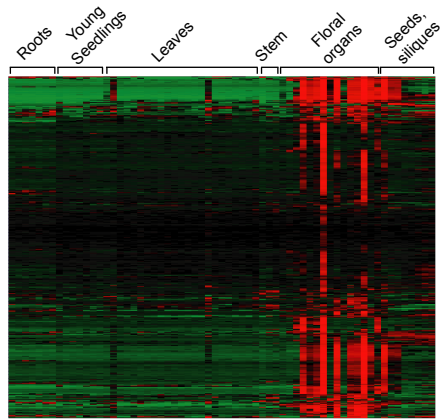

| GO Term    | % in Genome | % in Cluster | p-value     | definition                                           |
|------------|-------------|--------------|-------------|------------------------------------------------------|
| GO:0012505 | 14.6%       | 26.8%        | $10^{-30}$  | endomembrane system                                  |
| GO:0016020 | 23.5%       | 39.3%        | $10^{-30}$  | membrane                                             |
| GO:0015385 | 0.1%        | 2.0%         | $10^{-8.0}$ | sodium:hydrogen antiporter activity                  |
| GO:0004650 | 0.3%        | 2.5%         | $10^{-7.7}$ | polygalacturonase activity                           |
| GO:0004553 | 1.4%        | 5.5%         | $10^{-7.7}$ | hydrolase activity, hydrolyzing O-glycosyl compounds |
| GO:0005451 | 0.2%        | 2.0%         | $10^{-7.0}$ | monovalent cation:proton antiporter activity         |

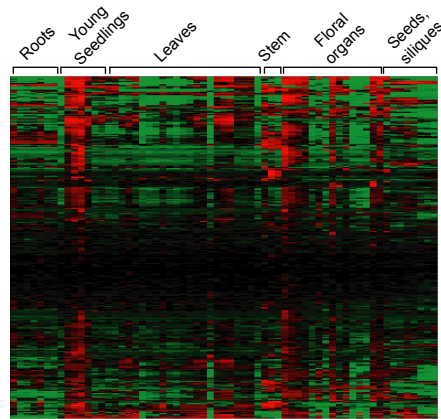

| GO Term    | % in Genome | % in Cluster | p-value      | definition                       |
|------------|-------------|--------------|--------------|----------------------------------|
| GO:0003677 | 8.1%        | 23.5%        | $10^{-30}$   | DNA binding                      |
| GO:0003700 | 6.3%        | 21.9%        | $10^{-30}$   | transcription factor activity    |
| GO:0006350 | 6.0%        | 16.8%        | $10^{-30}$   | transcription                    |
| GO:0007389 | 0.2%        | 3.9%         | $10^{-30}$   | pattern specification            |
| GO:0003676 | 10.8%       | 25.8%        | $10^{-10.9}$ | nucleic acid binding             |
| GO:0030528 | 6.8%        | 23.2%        | $10^{-10.8}$ | transcription regulator activity |

Supplemental Figure 3
