# Supplementary material
Source: PubMed Central journal article supplement (PMC1868063)
Supplement: pbio.0050129.st001.pdf [file pbio.0050129.st001.pdf]

**Table S1.** PCR primers used for validation of H3K27me3 results

| Region in Figure S2 | Chromosome | From     | To       | Forward Primer           | Reverse Primer              |
|---------------------|------------|----------|----------|--------------------------|-----------------------------|
| 1                   | 2          | 17826400 | 17826638 | GGCTCTCTGCTTTCATTTACTTT  | ATTTGGTTGTGTTTCAGAAATGG     |
| 2                   | 2          | 17827684 | 17827888 | GGGTGGTGCGAGTAATGAAG     | GTAGAGACGGCCTCGAGTGG        |
| 3                   | 2          | 17831870 | 17832091 | CCTCAATTCCATTGTCAGCA     | TGCCAGAACACATGTAGCAG        |
| 4                   | 2          | 17834158 | 17834425 | TGTGTGATGGAGTGGAAGGA     | TCCGTAAGGTTTGAGGATGC        |
| 5                   | 2          | 17835312 | 17835518 | TTGCTATTTGATCTGGTATTCACC | TCTCTAAGCAAAAAGTTTGATCTCATC |
| 6                   | 5          | 23039110 | 23039321 | GGAATCAGAAATCCAACAGG     | TTGATGCTCTTCGTGCACTT        |
| 7                   | 5          | 23040576 | 23040783 | ACGAACCAATGCTGATGTGA     | ACGCCAAAGTTCGACTTGAT        |
| 8                   | 5          | 23042577 | 23042857 | AAGCAATGCCGTATTGATCC     | GCTGCACTTCAACAGCTTCA        |
| 9                   | 5          | 23046464 | 23046679 | TTTCACGCCAAGGGCTATAC     | GATCCTGGAACCTCCATCAA        |
| 10                  | 4          | 12497529 | 12497728 | GAGAGTTCTGGCGAAACGAG     | TGAGAAGGTTAAGAGGAAGATCAAG   |
| 11                  | 4          | 12501040 | 12501280 | GCTGCTTATTGGTTGGTCGT     | GGTGGTTCAATGTTTCGAT         |
| 12                  | 4          | 12504534 | 12504817 | AGGCCAGAAAAGGATCAAGC     | CTCATGAGGTGGTGGTGATG        |
| 13                  | 4          | 12508868 | 12509070 | ACTTCACGATCCAGGAAACC     | CAACCACCGCCTTCTTAAAC        |
| 14                  | 4          | 12512014 | 12512289 | TTGATGGGATGGATTGTGTG     | AAGCGTTGACCTCATCAACC        |
