# Supplementary material
Source: PubMed Central journal article supplement (PMC1868063)
Supplement: pbio.0050129.st002.pdf [file pbio.0050129.st002.pdf]

**Table S2.** PCR primers used for validation of low nucleosome density regions

| Region in Figure S5 | In the promoter of | Forward Primer            | Reverse Primer            |
|---------------------|--------------------|---------------------------|---------------------------|
| 1                   | At5g13100          | CCTTTTGTGAGATTCGGATGG     | TGTGATCAGAGTAAAGATGGGTTT  |
| 2                   | At5g13230          | CAAGTGTTTGGCTTTGGTCA      | CAGGATAAACTGTTGGTGTG      |
| 3                   | At4g27260          | TTGTTATGGACGGACACACC      | AATACGCAAATCATTCTCCA      |
| 4                   | At5g14210          | GCCCTCTTTATGCCACAAGT      | CCCAACCATATAATAGCATTTCTAA |
| 5                   | At2g15520          | AAAGACAACTGTCACCGTAAGAA   | TCGACGTCAACTGCTAACGA      |
| 6                   | At5g10460          | TGTCGTCTGCAAAGGAAAAA      | AAAAATTCCTTCTGGACTCACG    |
| 7                   | At4g01330          | CGCCCAAACCTTATCCTTTT      | AAACCGGTGAACTAATGAATGA    |
| 8                   | At4g00640          | TGGAAAATGACTTGGTCACG      | ACTCGTACTCGCATGTGGTG      |
| 9                   | At3g07190          | CACGCAGTTCCAAATTCCTT      | TTCTCTACGGTCTACATGCTAACAA |
| 10                  | At3g07390          | GAGGTAGACGGGCATTGGTA      | TTGGTTATGAGCCAAAATTCA     |
| 11                  | At2g24560          | ACTCAGAGCCGACATTTGGT      | CACGGGTCTGTCTAGTTCTCG     |
| 12                  | At5g14130          | TTCATGGCGATCAGTCAAAA      | AGTGTCGTTAAACACAAAATGGA   |
| 13                  | At1g24120          | CCTCGATAAAGCCCAAGAAA      | CAACGACGAGGACACTTCAA      |
| 14                  | At1g09780          | TGACCATTTGAGATTTAAAAGAACT | TTTCAACTTTCAATATGACGAACC  |
| 15                  | At1g09860          | TTCGATTCACACGAGTTTGC      | CCGTAAAACCGACTTCAACC      |
| 16                  | At1g09940          | GCATATTTTCTTGGCTAAATTGG   | GAAAAAGCCCATCAAAGCTG      |
| 17                  | At4g27320          | TCCCGTACGTTGAGTTTGACT     | GGAATTGACGATGTCGTGTG      |
