# Supplementary material
Source: PubMed Central journal article supplement (PMC1868063)

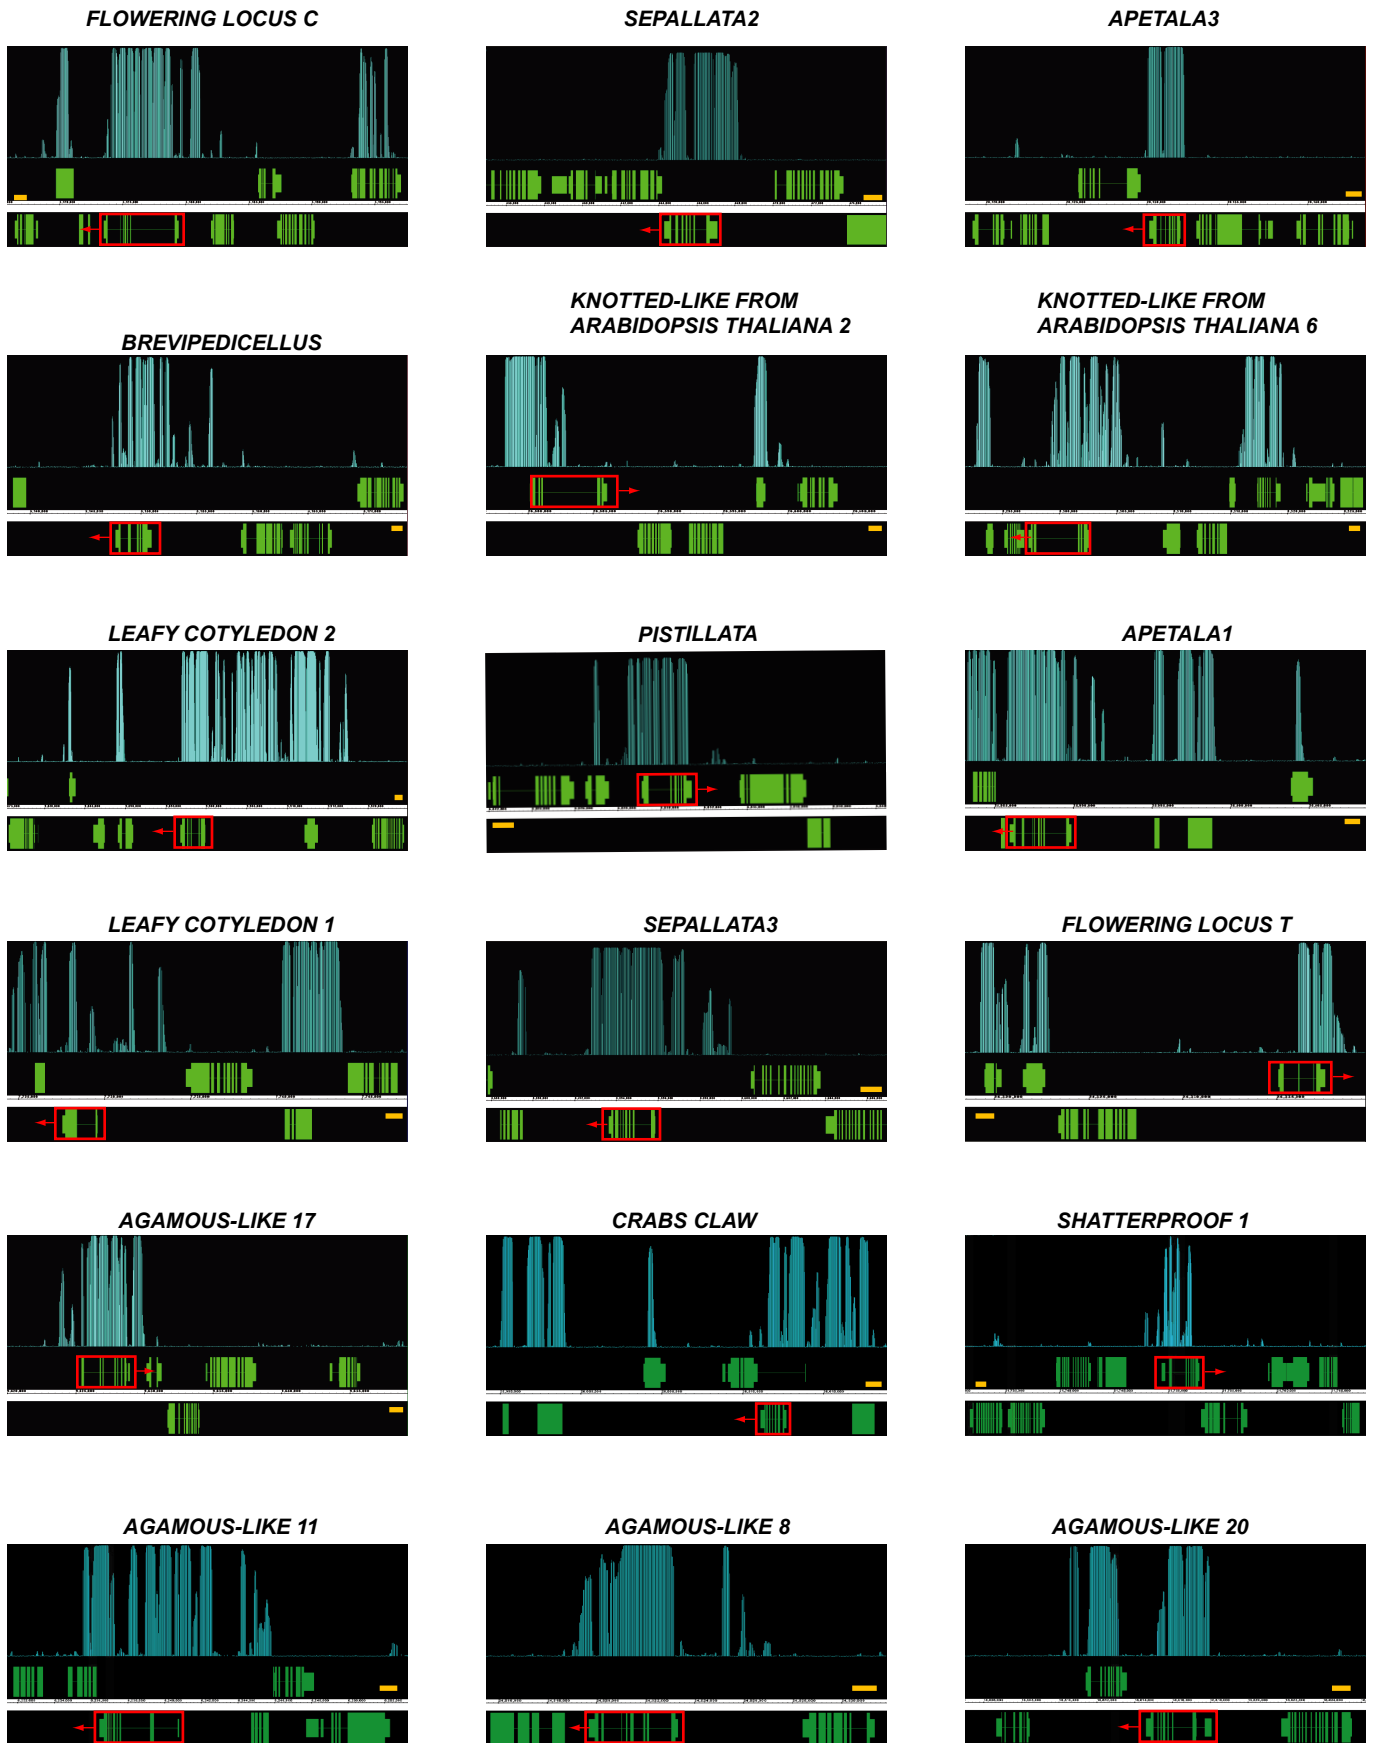

Supplemental Figure 1

Supplement: pbio.0050129.sg001.pdf [file pbio.0050129.sg001.pdf]

Chr2

Chr5

Chr4

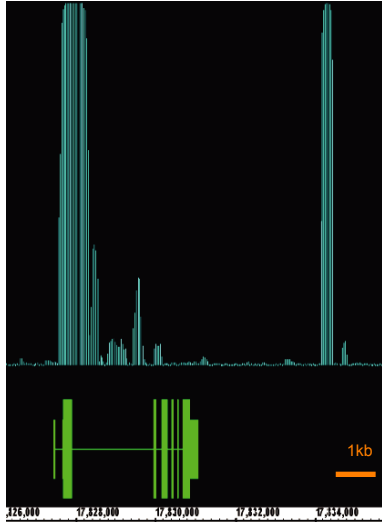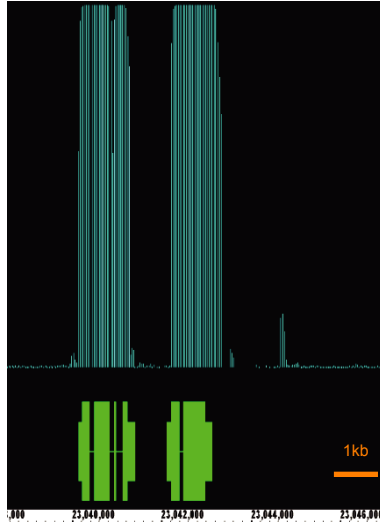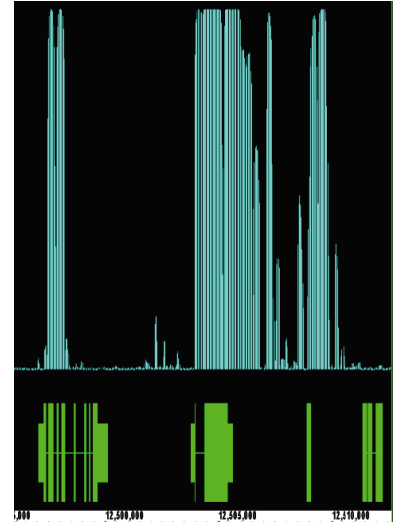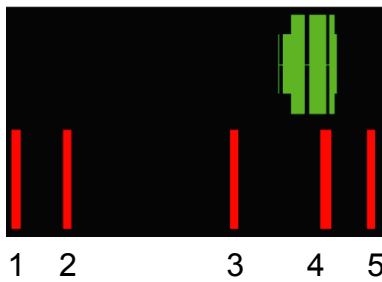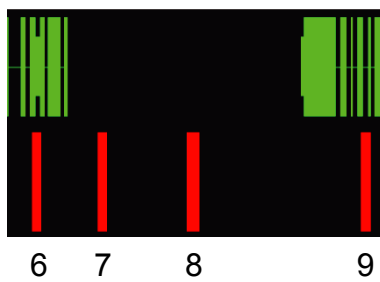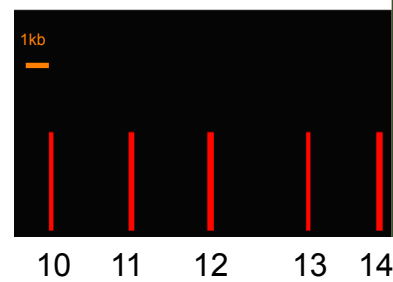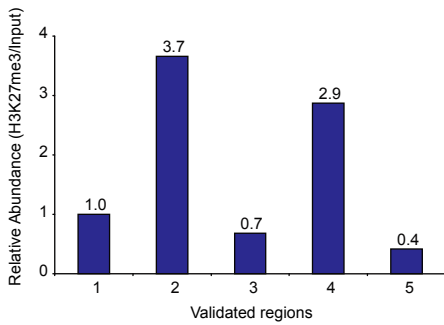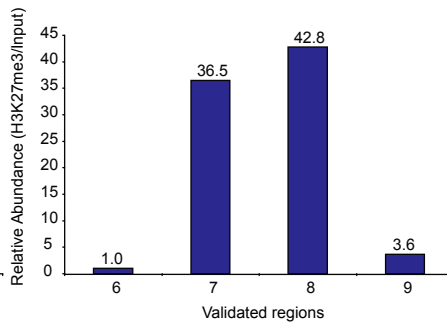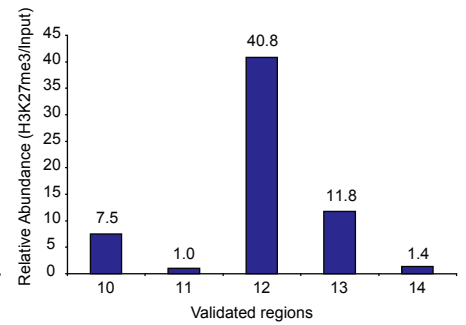

Supplemental Figure 2

Supplement: pbio.0050129.sg002.pdf [file pbio.0050129.sg002.pdf]

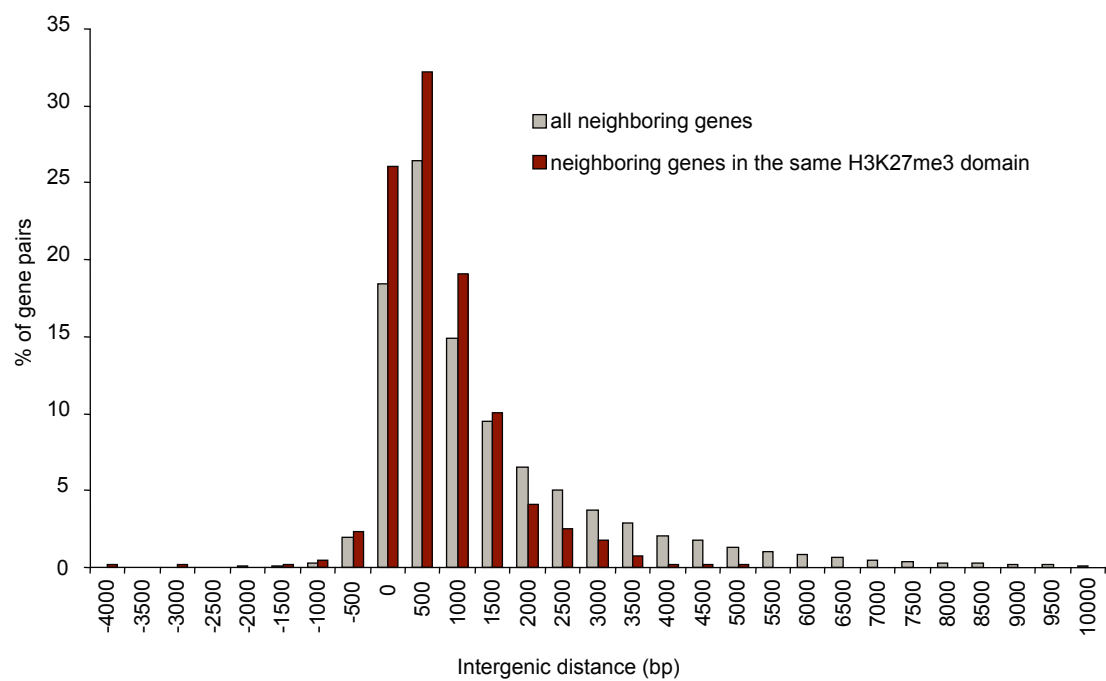

Supplemental Figure 4

Supplement: pbio.0050129.sg004.pdf [file pbio.0050129.sg004.pdf]

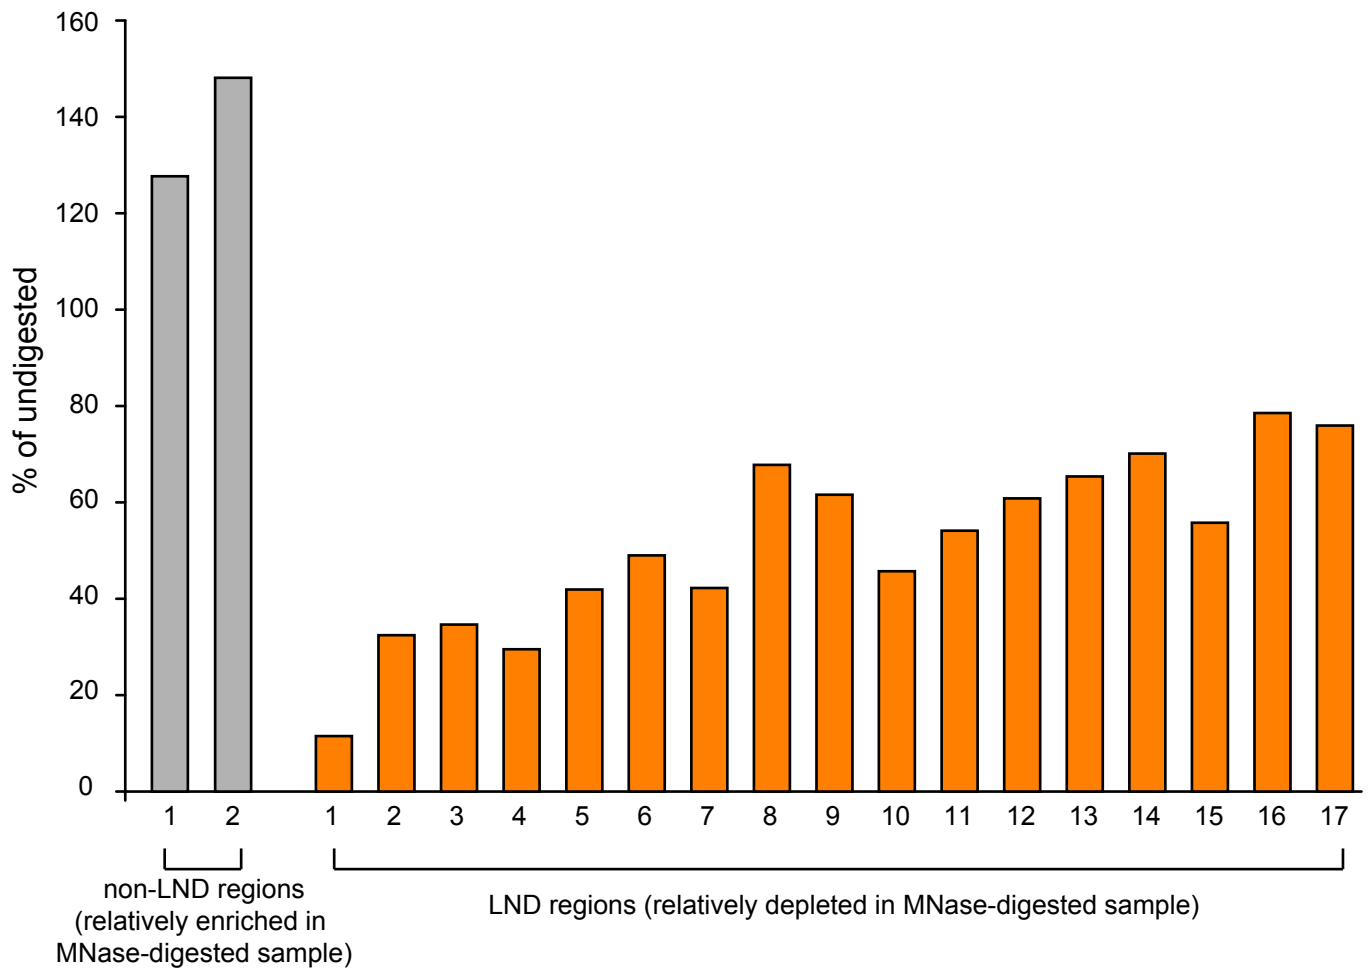

Supplemental Figure 5

Supplement: pbio.0050129.sg005.pdf [file pbio.0050129.sg005.pdf]

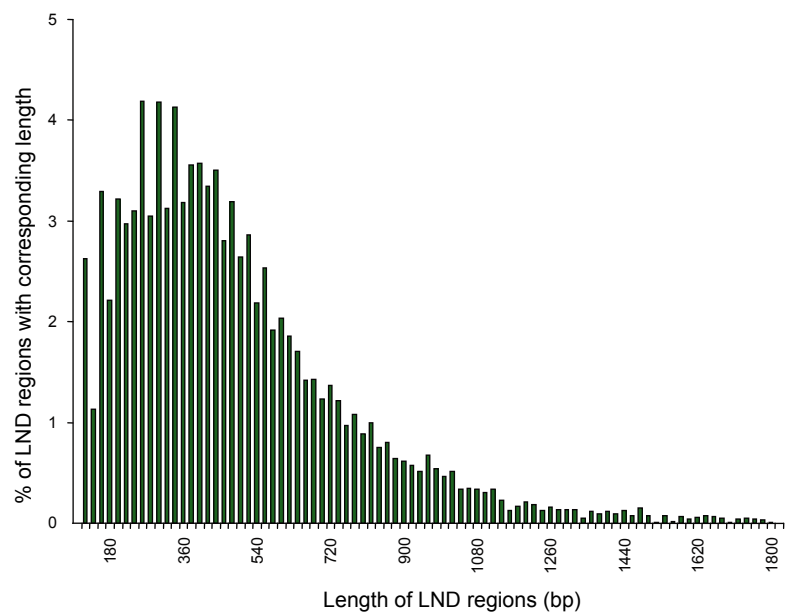

Supplemental Figure 6

Supplement: pbio.0050129.sg006.pdf [file pbio.0050129.sg006.pdf]

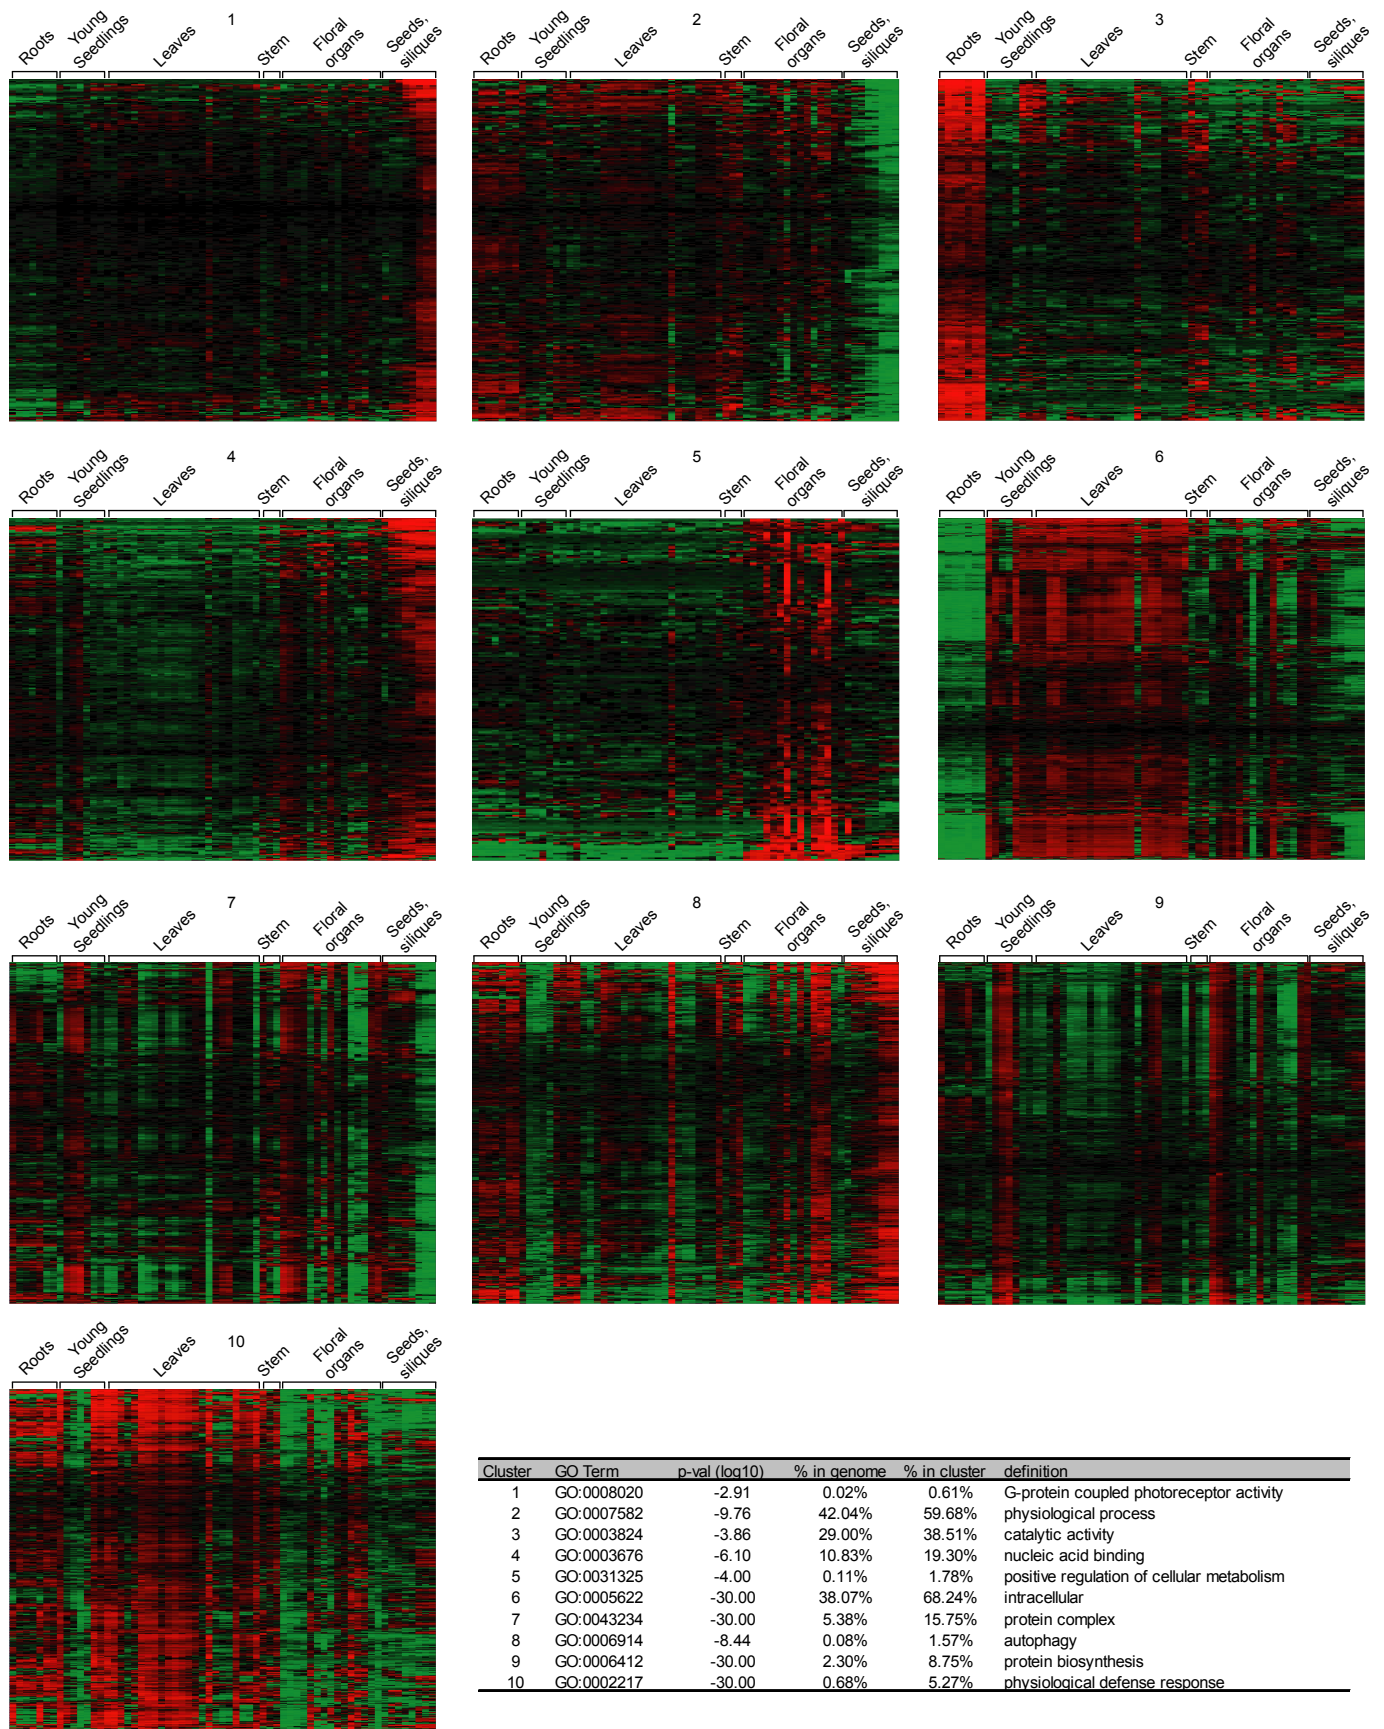

Supplemental Figure 7

Supplement: pbio.0050129.sg007.pdf [file pbio.0050129.sg007.pdf]

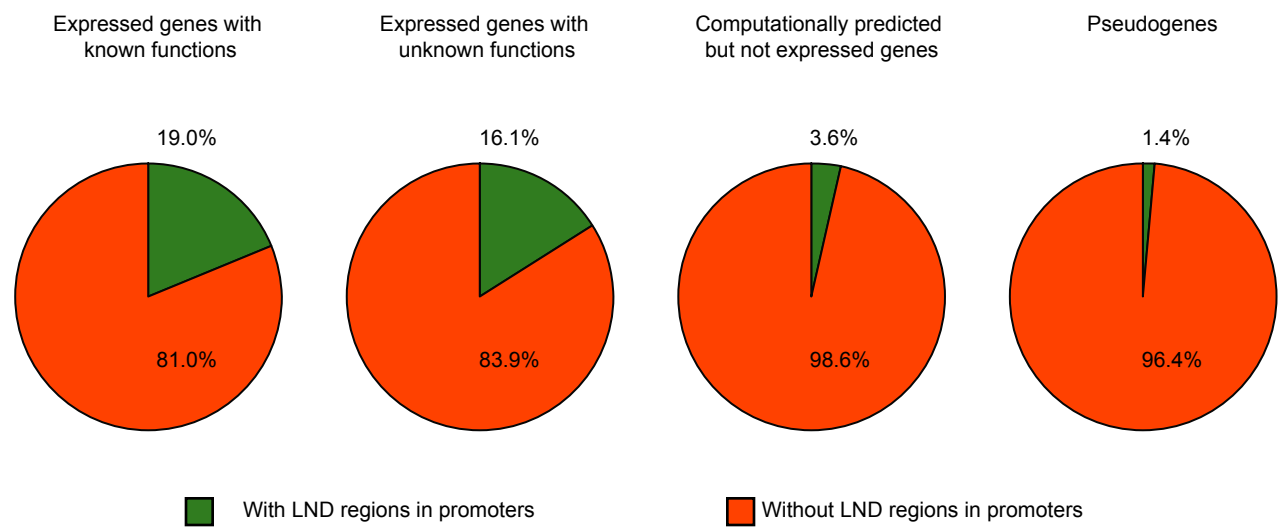

Supplemental Figure 8

Supplement: pbio.0050129.sg008.pdf [file pbio.0050129.sg008.pdf]

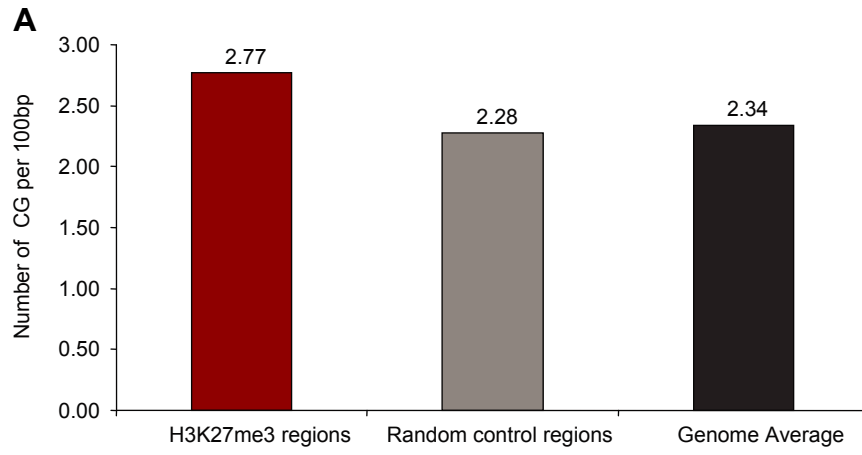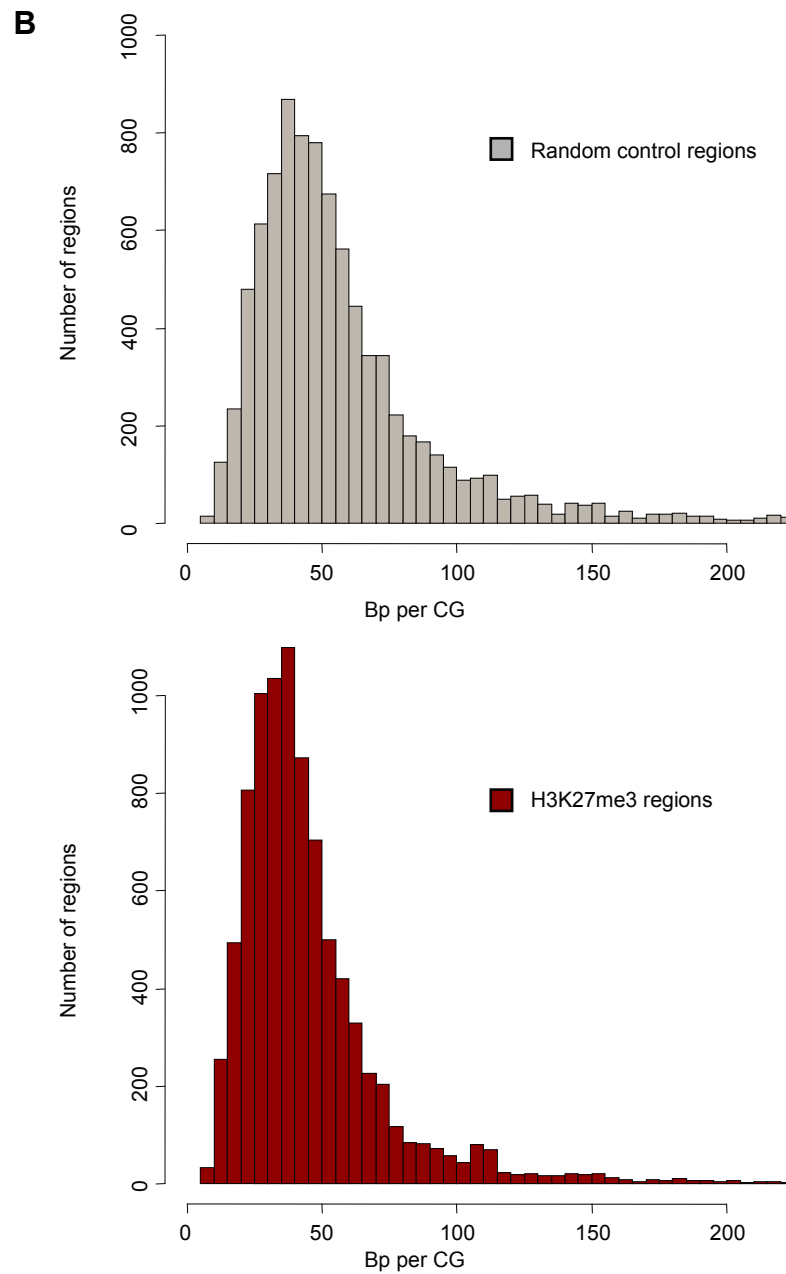

Supplemental Figure 9

Supplement: pbio.0050129.sg009.pdf [file pbio.0050129.sg009.pdf]

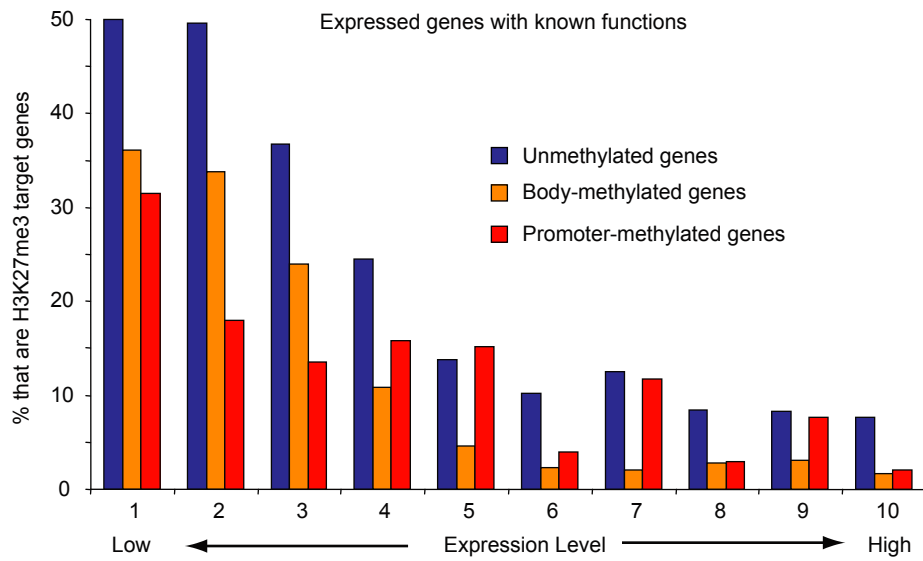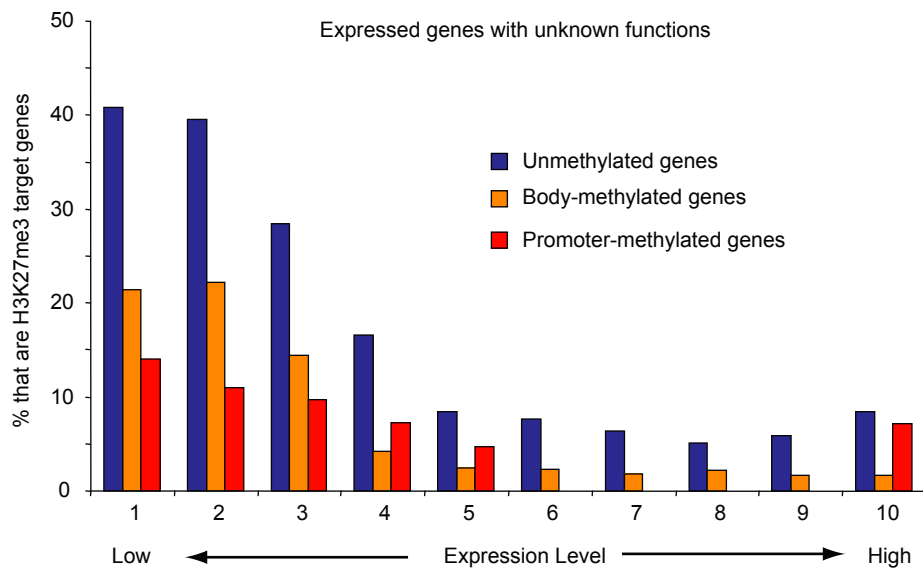

Supplemental Figure 10

Supplement: pbio.0050129.sg010.pdf [file pbio.0050129.sg010.pdf]
